# Supplementary material for: Adjuvant Cannabinoid Receptor Type 2 Agonist Modulates the Polarization of Microglia Towards a Non-Inflammatory Phenotype in Experimental Pneumococcal Meningitis
Source: PubMed Central journal article supplement (PMC7674855; doi:10.3389/fcimb.2020.588195), 2020-11-05
Supplement: DataSheet_1.pdf [file DataSheet_1.pdf]

## *Supplementary Material*

### **1 Supplementary Materials and Methods**

#### **1.1 Gelatin-sepharose affinity binding**

Gelatinases were enriched by incubating 300  $\mu$ g of brain homogenate with 20  $\mu$ l of Gelatin Sepharose 4B (GE Healthcare GmbH, Glattbrugg, Switzerland) on an orbital shaker overnight at 4°C. Sepharose beads were washed (50 mM Tris-HCl pH 7.6, 150 mM NaCl, 5 mM CaCl<sub>2</sub>, 0.02% NaN<sub>3</sub>, 0.05% Brij 25, 1% Triton X-100) and incubated with 2X zymography sample buffer (30 mM Tris HCl pH 6.8, 20% glycerol, 1% sodium dodecyl sulphate (SDS), 0.02% bromophenol blue) for 5 min at room temperature to elute bound proteins. After centrifugation, supernatants were collected and tested by gelatin gel zymography.

#### **1.2 Gelatin zymography**

Gelatin-sepharose-purified samples were subjected to electrophoresis under non-reducing conditions in polyacrylamide gels containing 1% (v/v) type A gelatin from porcine skin (Sigma-Aldrich). After electrophoresis, SDS was removed from the gels, and the MMP catalytic sites were activated by overnight incubation at 37°C in zymography buffer (10 mM CaCl<sub>2</sub>, 50 mM Tris, 50 mM NaCl, pH 7.65). Gels were scanned and gelatinolytic activities (MMP-9, gelatinase B, 92 kDa and MMP-2, gelatinase A, 72 kDa) were determined by quantification of gelatin lysis zones using Image J software and expressed as absolute numbers for each sample. Thereof, relative values of MMP-9/MMP-2 ratios were calculated as MMP-2 is constitutively expressed.

## 2 Supplementary Figures

### 2.1 Supplementary Figure 1

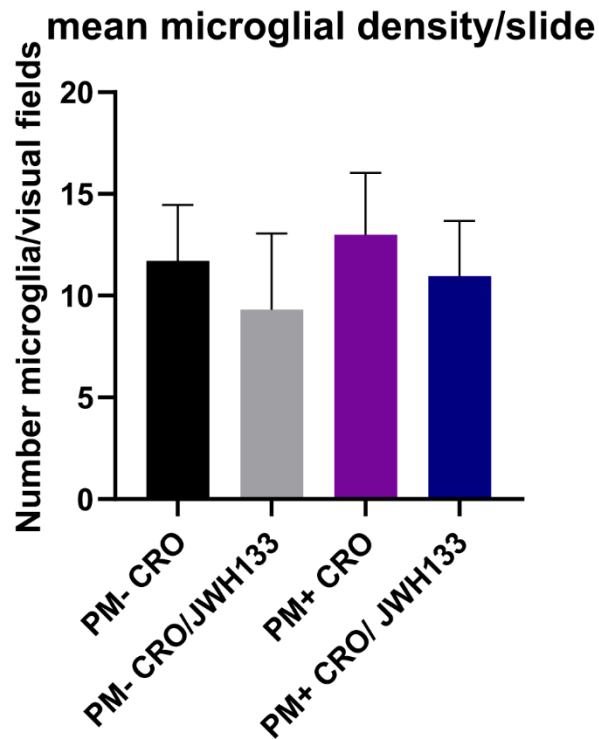

**Supplementary Figure 1: Quantitative assessment of microglial density on Iba-1 immunostained sections:** Neither infection, nor treatment significantly influenced the total number of microglia counted per analyzed image (Two-way ANOVA) (PM- CRO n=3; PM- CRO/JWH133 n=4; PM+ CRO n=8; PM+ CRO/JWH133 n=4).

## 2.2 Supplementary Figure 2

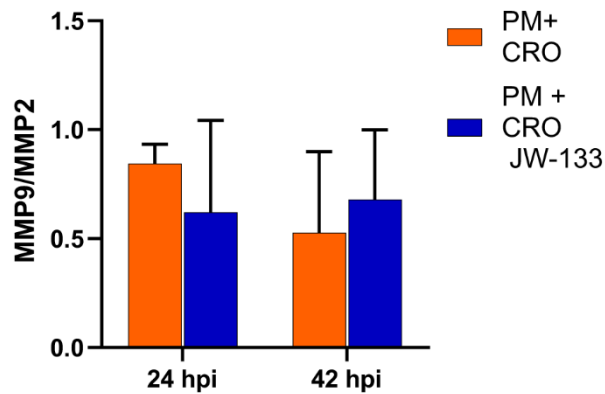

**Supplementary Figure 2 Level of MMP-9 in brain homogenates determined by gelatin gel zymography.** No significant differences could be detected between infected animals treated with CRO alone (orange bars) or CRO/JHW133 (blue bars) at 24 hpi (PM + CRO n=3, PM+ CRO/JWH133 n=3; p=0.67), or at 42 hpi (PM + CRO n=6, PM+ CRO/JWH133 n=6; p=0.69) (2 way ANOVA with Sidak correction).
